# Supplementary material for: Association of polymorphisms of PTEN, AKT1, PI3K, AR, and AMACR genes in patients with prostate cancer
Source: PubMed Central journal article supplement (PMC7271063; doi:10.1590/1678-4685-gmb-2018-0329), 2020-06-01
Supplement: 1415-4757-GMB-43-3-e20180329-s2.pdf [file 1415-4757-GMB-43-3-e20180329-s2.pdf]

## Supplementary Material to “Association of polymorphisms of *PTEN*, *AKT1*, *PI3K*, *AR*, and *AMACR* genes in patients with prostate cancer”

**Table S2** – Association between genotypes of *PTEN*, *AKT*, *PI3K*, *AR*, and *AMACR* genes and clinicopathological features in prostate cancer patients

| Genes<br>SNP_ID           | Genotypes | Bilaterality (N=258) |            |                          | Extracapsular extension (N=257) |            |                   |
|---------------------------|-----------|----------------------|------------|--------------------------|---------------------------------|------------|-------------------|
|                           |           | P<br>N (%)           | A<br>N (%) | OR (CI95%)               | P<br>N (%)                      | A<br>N (%) | OR (CI95%)        |
| <i>PTEN</i><br>rs2735343  | CC        | 27 (19.7)            | 24 (19.8)  | Reference                | 15(15.5)                        | 36 (22.5)  | Reference         |
|                           | CG        | 57 (41.6)            | 53 (43.8)  | 0.96 (0.49-1.86)         | 47 (48.5)                       | 62 (38.8)  | 1.82 (0.89-3.71)  |
|                           | GG        | 53 (38.7)            | 44 (36.4)  | 1.07 (0.54-2.11)         | 35 (36.1)                       | 62 (38.8)  | 1.36 (0.65-2.82)  |
|                           | CG+GG     | 110 (80.3)           | 97 (80.2)  | 1.01 (0.55-1.86)         | 82 (84.5)                       | 124 (77.5) | 1.59 (0.82-3.08)  |
| <i>AKT1</i><br>rs2494750  | CC        | 106 (77.4)           | 90 (74.4)  | Reference                | 77 (79.4)                       | 118 (73.8) | Reference         |
|                           | CG        | 30 (21.9)            | 31 (25.6)  | 0.82 (0.46-1.46)         | 20 (20.6)                       | 41 (25.6)  | 0.75 (0.41-1.37)  |
|                           | GG        | 1 (0.7)              | -          | -                        | 0 (0.0)                         | 1 (0.6)    | -                 |
|                           | CG+GG     | 31 (22.6)            | 31 (25.6)  | 0.85 (0.48-1.50)         | 20 (20.6)                       | 42 (26.3)  | 0.73 (0.40-1.34)  |
| <i>PI3K</i><br>rs2699887  | GG        | 85 (62.0)            | 73 (60.3)  | Reference                | 61 (62.9)                       | 96 (60.0)  | Reference         |
|                           | GA        | 44 (32.1)            | 41 (33.9)  | 0.92 (0.54-1.56)         | 31 (32.0)                       | 54 (33.8)  | 0.90 (0.52-1.56)  |
|                           | AA        | 8 (5.8)              | 7 (5.8)    | 0.98 (0.34-2.84)         | 5 (5.2)                         | 10 (6.3)   | 0.79 (0.26-2.41)  |
|                           | GA+AA     | 52 (38.0)            | 48 (39.7)  | 0.93 (0.56-1.54)         | 36 (37.1)                       | 64 (40.0)  | 0.89 (0.53-1.49)  |
| <i>AMACR</i><br>rs3591676 | GG        | 60 (43.8)            | 41 (33.9)  | Reference                | 37 (38.1)                       | 64 (40.0)  | Reference         |
|                           | GA        | 58 (42.3)            | 56 (46.3)  | 0.71 (0.41-1.22)         | 43 (44.3)                       | 70 (43.8)  | 1.06 (0.61-1.85)  |
|                           | AA        | 19 (13.9)            | 24 (19.8)  | 0.54 (0.26-1.11)         | 17 (17.5)                       | 26 (16.3)  | 1.13 (0.54- 2.34) |
|                           | GA+AA     | 77 (56.2)            | 80 (66.1)  | 0.66 (0.40-1.09)         | 60 (61.9)                       | 96 (60.0)  | 1.11 (0.65-1.88)  |
| <i>AR</i><br>rs17302090   | G         | 56 (40.9)            | 38 (31.4)  | Reference                | 34 (35.1)                       | 60 (37.5)  | Reference         |
|                           | A         | 81 (59.1)            | 83 (68.6)  | 0.66 (0.40-1.11)         | 63 (64.9)                       | 100 (62.5) | 1.11 (0.66-1.88)  |
| <i>PTEN</i><br>rs2735343  | CC        | 8 (25.0)             | 43 (19.1)  | Reference                | 7 (16.7)                        | 44 (20.5)  | Reference         |
|                           | CG        | 12 (37.5)            | 97 (43.1)  | 0.67 (0.25-1.74)         | 21 (50.0)                       | 88 (40.9)  | 1.50 (0.59-3.80)  |
|                           | GG        | 12 (37.5)            | 85 (37.8)  | 0.76 (0.29-2.00)         | 14 (33.3)                       | 83 (38.6)  | 1.06 (0.40-2.82)  |
|                           | CG+GG     | 24 (75.0)            | 182 (80.9) | 0.71 (0.30-1.69)         | 35 (83.3)                       | 171 (79.5) | 1.29 (0.54-3.09)  |
| <i>AKT1</i><br>rs2494750  | CC        | 27 (84.4)            | 168 (74.7) | Reference                | 30 (71.4)                       | 165 (76.7) | Reference         |
|                           | CG        | 5 (15.6)             | 56 (24.9)  | 0.56 (0.20-1.48)         | 11 (26.2)                       | 50 (23.3)  | 1.21 (0.57-2.59)  |
|                           | GG        | 0 (0.0)              | 1 (0.4)    | -                        | 1 (2.4)                         | 0 (0.0)    | -                 |
|                           | CG+GG     | 5 (15.6)             | 57 (25.3)  | 0.55 (0.20-1.51)         | 12 (28.6)                       | 50 (23.3)  | 1.32 (0.63-2.77)  |
| <i>PI3K</i><br>rs2699887  | GG        | 19 (59.4)            | 138 (61.3) | Reference                | 30 (71.4)                       | 127 (59.1) | Reference         |
|                           | GA        | 12 (37.5)            | 73 (32.4)  | 1.19 (0.55-2.60)         | 11 (26.2)                       | 74 (34.4)  | 0.63 (0.30-1.33)  |
|                           | AA        | 1 (3.1)              | 14 (6.2)   | 0.52 (0.07-4.17)         | 1 (2.4)                         | 14 (6.5)   | 0.30 (0.04-2.39)  |
|                           | GA+AA     | 13 (40.6)            | 87 (38.7)  | 1.09 (0.51-2.31)         | 12 (28.6)                       | 88 (40.9)  | 0.58 (0.28-1.20)  |
| <i>AMACR</i><br>rs3591676 | GG        | 19 (59.4)            | 82 (36.4)  | Reference                | 20 (47.6)                       | 81 (37.7)  | Reference         |
|                           | GA        | 8 (25.0)             | 105 (46.7) | <b>0.32 (0.13-0.78)*</b> | 14 (33.3)                       | 99 (46.0)  | 0.57 (0.27-1.21)  |
|                           | AA        | 5 (15.6)             | 38 (16.9)  | 0.56 (0.19-1.63)         | 8 (19.0)                        | 35 (16.3)  | 0.93 (0.37-2.30)  |
|                           | GA+AA     | 13 (40.6)            | 143 (63.6) | <b>0.39 (0.18-0.83)*</b> | 22 (52.4)                       | 134 (62.3) | 0.67 (0.34-1.29)  |
| <i>AR</i><br>rs17302090   | G         | 16 (50.0)            | 68 (34.7)  | Reference                | 18 (42.9)                       | 76 (35.3)  | Reference         |
|                           | A         | 16 (50.0)            | 147 (65.3) | 0.53 (0.25-1.12)         | 24 (57.1)                       | 139 (64.7) | 0.73 (0.37-1.43)  |

| Genes<br>SNP_ID           | Genotypes | Bilaterality (N=258) |            |                  | Extracapsular extension (N=257) |            |                  |
|---------------------------|-----------|----------------------|------------|------------------|---------------------------------|------------|------------------|
|                           |           | P<br>N (%)           | A<br>N (%) | OR (CI95%)       | P<br>N (%)                      | A<br>N (%) | OR (CI95%)       |
| <i>PTEN</i><br>rs2735343  | CC        | 35 (22.7)            | 16 (15.8)  | Reference        | 31 (19.7)                       | 24 (20.9)  | Reference        |
|                           | CG        | 58 (37.7)            | 50 (49.5)  | 1.89 (0.94-3.81) | 63 (40.1)                       | 50 (43.5)  | 1.03 (0.54-1.96) |
|                           | GG        | 61 (39.6)            | 35 (34.7)  | 1.26 (0.61-2.59) | 63 (40.1)                       | 41 (35.7)  | 0.84 (0.43-1.63) |
|                           | CG+GG     | 119 (77.3)           | 85 (84.2)  | 1.56 (0.81-3.00) | 126 (80.3)                      | 91 (79.1)  | 0.93 (0.51-1.70) |
| <i>AKTI</i><br>rs2494750  | CC        | 114 (74.0)           | 80 (79.2)  | Reference        | 122 (77.7)                      | 85 (73.9)  | Reference        |
|                           | CG        | 40 (26.0)            | 21 (20.8)  | 0.75 (0.41-1.36) | 34 (21.7)                       | 30 (26.1)  | 1.27 (0.72-2.23) |
|                           | GG        | 0 (0.0)              | 0 (0.0)    | -                | 1 (0.6)                         | 0 (0.0)    | 0.99 (-)         |
|                           | CG+GG     | 40 (26.0)            | 21 (20.8)  | 0.75 (0.41-1.36) | 35 (22.3)                       | 30 (26.1)  | 1.23 (0.70-2.16) |
| <i>PI3K</i><br>rs2699887  | GG        | 94 (61.0)            | 62 (61.4)  | Reference        | 101 (64.3)                      | 68 (59.1)  | Reference        |
|                           | GA        | 51 (33.1)            | 34 (33.7)  | 1.01 (0.59-1.73) | 51 (32.5)                       | 37 (32.2)  | 1.08 (0.64-1.82) |
|                           | AA        | 9 (5.8)              | 5 (5.0)    | 0.84 (0.27-2.63) | 5 (3.2)                         | 10 (8.7)   | 2.97 (0.97-9.07) |
|                           | GA+AA     | 60 (39.0)            | 39 (38.6)  | 0.96 (0.59-1.65) | 56 (35.7)                       | 47 (40.9)  | 1.25 (0.76-2.05) |
| <i>AMACR</i><br>rs3591676 | GG        | 61 (39.6)            | 40 (39.6)  | Reference        | 59 (37.6)                       | 47 (40.9)  | Reference        |
|                           | GA        | 66 (42.9)            | 45 (44.6)  | 1.01 (0.59-1.65) | 69 (43.9)                       | 54 (47.0)  | 0.95 (0.58-1.66) |
|                           | AA        | 27 (17.5)            | 16 (15.8)  | 0.84 (0.27-2.63) | 29 (18.5)                       | 14 (12.2)  | 0.61 (0.29-1.28) |
| <i>AR</i><br>rs17302090   | G         | 58 (37.7)            | 36 (35.6)  | Reference        | 54 (38.3)                       | 44 (34.4)  | Reference        |
|                           | A         | 96 (62.3)            | 65 (64.4)  | 1.09 (0.65-1.84) | 103 (65.6)                      | 71 (61.7)  | 0.85 (0.51-1.40) |
| <i>PTEN</i>               | CC        | 35 (22.7)            | 16 (15.8)  | Reference        | 31 (19.7)                       | 24 (20.9)  | Reference        |

  

| Gleason (N=275)           |           |                    |                     |                           |
|---------------------------|-----------|--------------------|---------------------|---------------------------|
| Genes<br>SNP_ID           | Genotypes | 3 to 7 (3+4) N (%) | 7 (4+3) to 10 N (%) | Genes<br>SNP_ID           |
| <i>PTEN</i><br>rs2735343  | CC        | 47 (20.5)          | 8 (17.4)            | <i>PTEN</i><br>rs2735343  |
|                           | CG        | 95 (41.5)          | 19 (41.3)           |                           |
|                           | GG        | 87 (38.0)          | 19 (41.3)           |                           |
|                           | CG+GG     | 182 (79.5)         | 38 (82.6)           |                           |
| <i>AKTI</i><br>rs2494750  | CC        | 171 (74.7)         | 37 (80.4)           | <i>AKTI</i><br>rs2494750  |
|                           | CG        | 57 (24.9)          | 9 (19.6)            |                           |
|                           | GG        | 1 (0.4)            | 0 (0.0)             |                           |
|                           | CG+GG     | 58 (25.3)          | 9 (19.6)            |                           |
| <i>PI3K</i><br>rs2699887  | GG        | 143 (62.4)         | 28 (60.9)           | <i>PI3K</i><br>rs2699887  |
|                           | GA        | 74 (32.3)          | 15 (32.6)           |                           |
|                           | AA        | 12 (5.2)           | 3 (6.5)             |                           |
|                           | GA+AA     | 86 (37.6)          | 18 (39.1)           |                           |
| <i>AMACR</i><br>rs3591676 | GG        | 86 (37.6)          | 20 (43.5)           | <i>AMACR</i><br>rs3591676 |
|                           | GA        | 104 (45.4)         | 20 (43.5)           |                           |
|                           | AA        | 39 (17.0)          | 6 (13.0)            |                           |
|                           | GA+AA     | 143 (62.4)         | 26 (56.5)           |                           |
| <i>AR</i><br>rs17302090   | G         | 79 (34.5)          | 19 (41.3)           | <i>AR</i><br>rs17302090   |
|                           | A         | 150 (65.5)         | 27 (58.7)           |                           |

OR (CI95%): Odds Ratio value, with a confidence interval of 95%;

\*Statistically significant value,  $p < 0.05$ .
